# Supplementary material for: Pharmacists’ Knowledge, Attitudes, and Practices Toward the Management of Couple Infertility
Source: Research Square preprint supplement (doi:10.21203/rs.3.rs-7122388/v1), 2025-08-27
Supplement: Supplementary file 2 [file 95813c8cf1f00739c8be3b4f.docx]

**Data Collection Sheet**

**Sheet No : …………….**

**Name of the Investigator**: ………………………………………………………..

**KNOWLEDGE, ATTITUDES, AND PRACTICES OF COMMUNITY PHARMACISTS REGARDING THE MANAGEMENT OF COUPLE INFERTILITY**

**Date: …/……/……**

**Pharmacy Name: ………………………………………………….......................**

**Pharmacy Address: ………………………………………………………………**

**PART 1: SOCIO-DEMOGRAPHIC CHARACTERISTICS OF THE RESPONDENT**

**Q1. Age**...........................years

**Q2. Gender**: 1) Male 2) Female

**Q3. Marital Status:**

1) Single 2) Married 3) Widowed

**Q4. Written Language:**

1) French 2) English 3) Others (specify): …………………

**Q5. Professional Qualification:**

1) Pharmacist 2) Assistant 3) Pharmacy Auxiliary

**Q6. Years of Experience: /… .................../**

**Q7. Year and Country of Diploma Obtainment (write "in progress" for assistants in their 6th year):**

1) Year: …………… Country: …………………………………………………………...

**Q8.Nationality…………………………………………………………………………**

**PART 2: GENERAL DATA**

**Q9. Had you heard about infertility before your formation?**

1) YES 2) NO

**i. If yes, through which channel?**

1) Media: radio, television 2) Social networks

3) A healthcare professional 4) A relative or friend

5) Others (please specify): …………………………………………………………………………….

**Q10. Did you complete an internship or training on fertility during your studies ?**

1) YES 2) NO

**i. If yes, at what stage?**

1) 1st Year

2) 2nd Year

3) 3rd Year

4) 4th Year

5) 5th Year

6) 6th Year

7) Other……………….

**ii. Duration (IN MONTHS)? / .................../**

**Q11. Have you received any postgraduate training on infertility**?

1) YES 2) NO

**i. If yes, how long has it been since the last postgraduate training and this survey? …/… ................... /**

**Q12. Do you encounter cases of couple infertility at your pharmacy counter?**

1) YES 2) NO

**i. If yes, how frequently?**

1) <1 case per day 2) 1 to 5 cases per day

3) 6 to 10 cases per day 4) >10 cases per day

**ii. Which age group is most represented?**

1) [15 years, 30 years[ 2) [31 years, 45 years[ 3) ≥46 years

**PART 3: KNOWLEDGE**

**Q13. Fertility is the biological ability of couples to achieve a live birth**:

1) True 2) False 3) I don’t know

**Q14. Infertility is the difficulty in conceiving a child:**

1) True 2) False 3) I don’t know

**Q15. A couple is considered infertile after 12 months of regular unprotected sexual intercourse without resulting in pregnancy:**

1) True 2) False 3) I don’t know

**Q16. Sterility is the total inability to conceive at a given time:**

1) True 2) False 3) I don’t know

**Q17. Azoospermia is the complete absence of sperm in the ejaculate:**

1) True 2) False 3) I don’t know

**Q18. Asthenospermia is the absence of sperm motility:**

1) True 2) False 3) I don’t know

**Q19. Oligospermia is a spermatic anomaly characterized by an abnormally low sperm count:**

1) True 2) False 3) I don’t know

**Q20. Teratospermia refers to sperm with abnormal morphology:**

1) True 2) False 3) I don’t know

**Q21. What are the causes of infertility common to both sexes that you know?**

1) Hormonal imbalance 2) Overweight 3) Infections

4) Medication treatments 5) Environmental factors

6) Other………………………

**Q22. What are the causes of infertility in women that you know?**

1) Ovarian insufficiency 2) Endometriosis

3) Polycystic ovary syndrome 4) Uterine abnormalities

5) Infections 6) Others……………….. …

**Q23. What are the causes of infertility in men that you know?**

1) Testicular insufficiency 2) Sexual dysfunctions

3) Others…………………….

**Q24. What preventive measures for infertility do you know?**

1) Avoid excessive alcohol and coffee consumption

2) Maintain a healthy weight and avoid smoking

3) Engage in reasonable and regular physical activity

4) Avoid consuming fatty acids

5) Avoid having multiple sexual partners

6) Others……………………………

**Q25. What pharmacological treatments for couple infertility do you know?**

1) Ovulation inducers (e.g., clomiphene citrate)

2) Dietary supplements

3) Anti-anemics (e.g., iron-folic acid)

4) Progestogens (e.g., dydrogesterone)

5) Antibiotics

6) Sildenafil

7) Others…………………………..

**Q26. What clinical examinations for infertility in couples do you know?**

1) Hysterosalpingography

2) Post-coital test

3) Semen analysis

4) Serological tests

5) Genetic tests

6) Pelvic ultrasound

7) Others…………………….

**Q27. Medically Assisted Reproduction (MAR) includes which medical practices?**

1) In vitro fertilization

2) Gamete preservation

3) Embryo transfer

4) Artificial insemination

5) Others…………………………………………..

**PART 4: ATTITUDES**

**Q28. Do you consider infertility a disease**?

1) Yes 2) No 3) I don’t know

**Q29. Where do you usually receive patients suffering from infertility?**

1) At the counter like any other patient 3) In an office

2) At the counter but away from others 4) Other (specify)…………….. **Q30. How do you feel discussing sexuality with a patient suffering from infertility?**

1) It makes me uncomfortable 2) I feel at ease discussing it

3) I feel like completely avoiding the topic 4) No particular feeling

**Q31. What is your opinion regarding a patient suffering from infertility?**

1) A condition like any other

2) A condition requiring urgent consultation

3) A condition necessarily linked to sexuality and socially stigmatized

4) No opinion

**Q32. What judgment would you have toward a patient seeking advice for infertility?**

1) Disdain, as they shouldn’t even be received in a pharmacy

2) No judgment

3) A client who likely needs my help

**PART 5: PRACTICES**

**Q33. Have you encountered patients complaining of infertility at the counter**?

1) Yes 2) No 3) I don’t know

**Q34. Do they agree to discuss their problems at the counter?**

1) Yes 2) No

**Q35. Who handles patients complaining of infertility?**

1) Pharmacist 2) Assistant

3) Pharmacy auxiliary 4) Everyone

**Q36. What do you do for patients complaining of infertility?**

1) Recommend dietary supplements

2) Recommend a medication (specify): ………………….

3) Refer for medical consultation

4) Do nothing

**Q37. Have you ever referred patients suffering from infertility for medical consultation?**

1) Yes 2) No

**Q38. Where do you refer patients suffering from infertility?**

1) Health center

2) Medical clinic

3) Traditional healer

4) Other (specify): ………………………………….

**Q39. Which specialist would you refer a woman suffering from infertility to?**

1) Gynecologist 2) Urologist 3) Cardiologist

4) Medical biologist 5) General practitioner

6) Midwife 7) Other (specify): ………………………………….

**Q40. Which specialist would you refer a man suffering from infertility to?**

1) Gynecologist 2) Urologist 3) Cardiologist

4) Medical biologist 5) General practitioner 6) Midwife

7) Other (specify): ………………………

**Q41. What advice would you give a patient suffering from infertility?**

1) Follow the treatment prescribed by your doctor 2) Avoid self-medication

3) Sleep under a mosquito net 4) Treat the sexual partner(s)
