# Supplementary figures and images for: Pharmacists’ Knowledge, Attitudes, and Practices Toward the Management of Couple Infertility
Source: Research Square preprint supplement (doi:10.21203/rs.3.rs-7122388/v1), 2025-08-27

**Investigation reports**


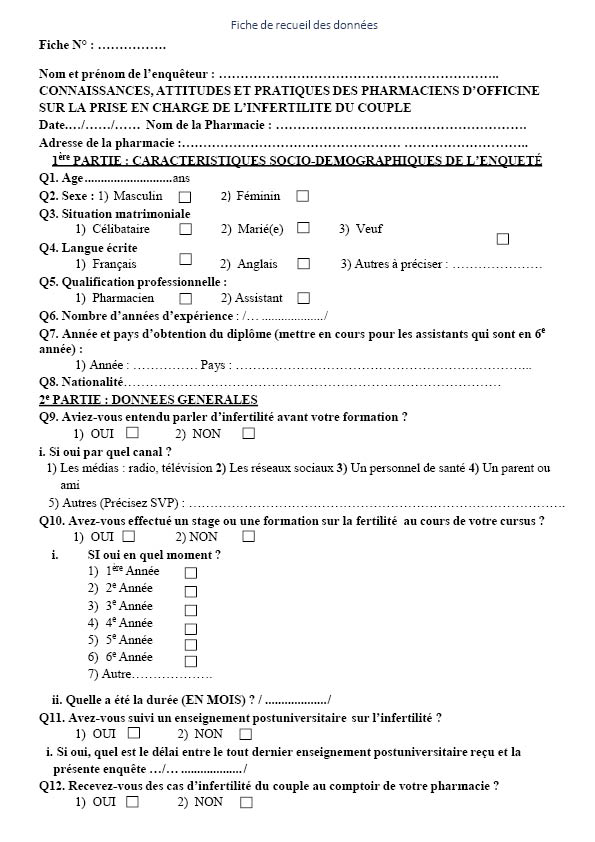


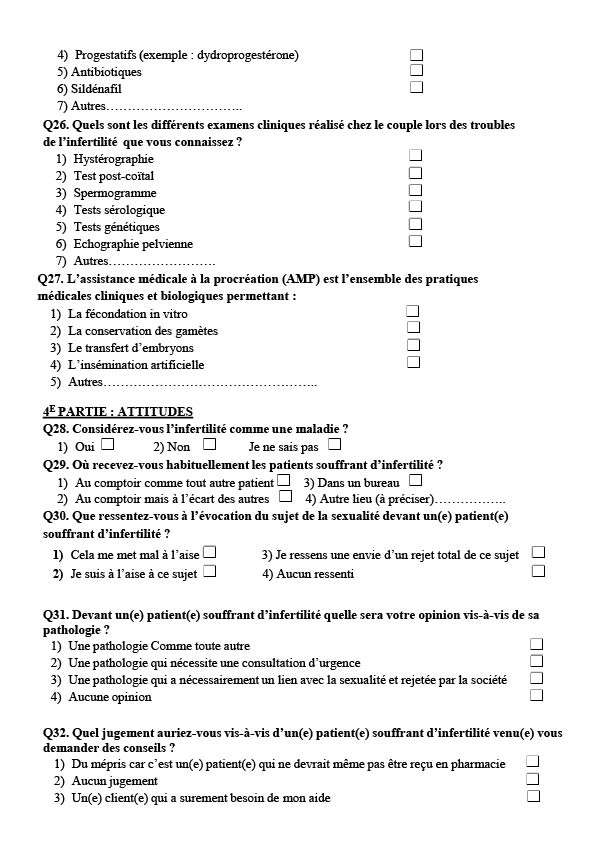


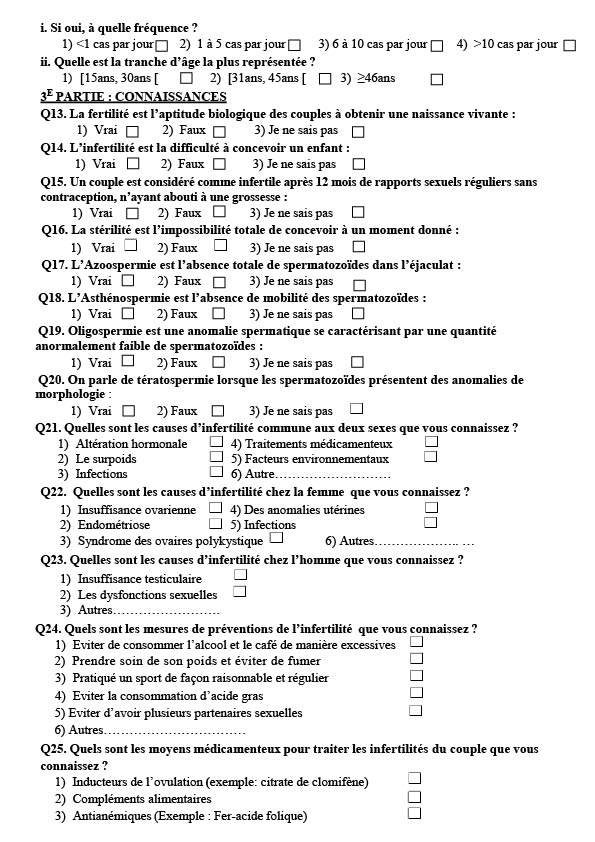


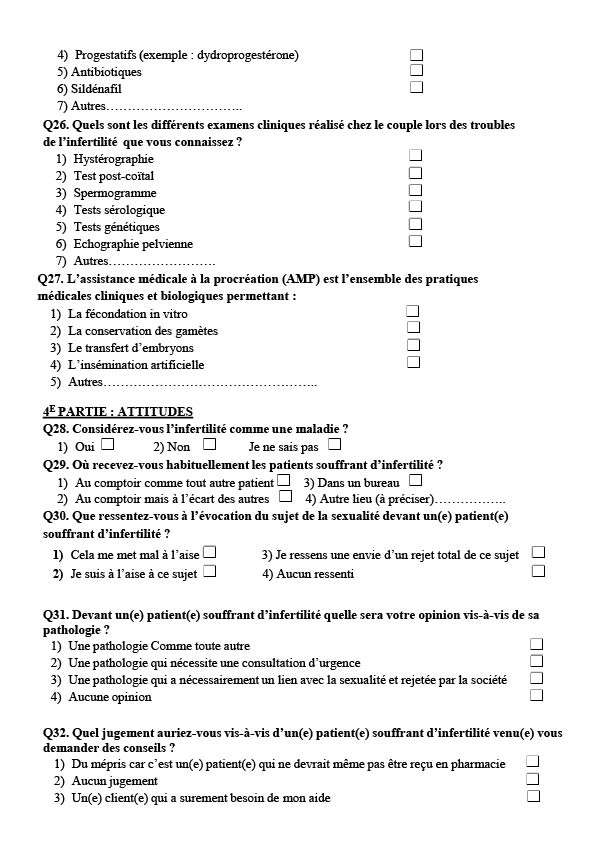


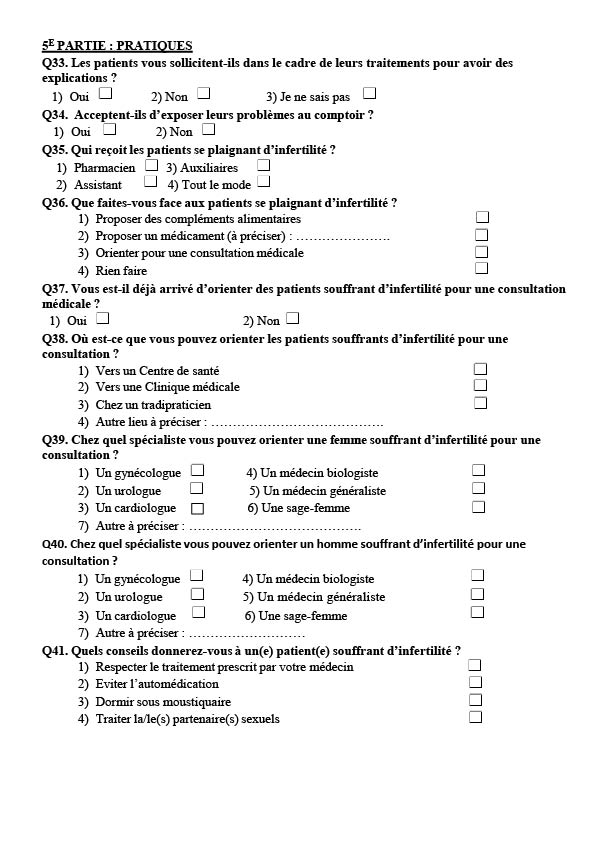

Supplement: Supplementary file 1 [file 29d61138a906965aa1877c8f.docx]
